# Supplementary material for: A novel supramolecular Zn(ii)-metallogel: an efficient microelectronic semiconducting device application
Source: Royal Society of Chemistry journal article supplement (doi:10.1039/d2ra07374a), 2023-01-01
Supplement: d2ra07374a1.pdf [file d2ra07374a1.pdf]

## *†Electronic Supplementary Information*

### **A novel Supramolecular Zn(II)-Metallogel: An Efficient Microelectronic Semiconducting Device Application**

Kripasindhu Karmakar,<sup>a,‡</sup> Arka Dey,<sup>b,‡</sup> Subhendu Dhibar,<sup>\*a</sup> Rajib Sahu,<sup>c</sup> Subham Bhattacharjee,<sup>d</sup> Priya Karmakar,<sup>a</sup> Priyajit Chatterjee,<sup>e</sup> Aniruddha Mondal,<sup>b</sup> Bidyut Saha<sup>\*a</sup>

<sup>a</sup>Colloid Chemistry Laboratory, Department of Chemistry, The University of Burdwan, Golapbag, Burdwan-713104, West Bengal, India

<sup>b</sup>Department of Physics, National Institute of Technology Durgapur, Durgapur-713209, West Bengal, India

<sup>c</sup>Max-Planck-Institut für Eisenforschung GmbH, Max-Planck-Str. 1, 40237 Düsseldorf, Germany.

<sup>d</sup>Department of Chemistry, Kazi Nazrul University, Asansol-713303, West Bengal, India.

<sup>e</sup>University Science Instrumentation Centre, The University of Burdwan, Golapbag, Burdwan-713104, West Bengal, India.

\*E-mail: [sdhibar@scholar.buruniv.ac.in](mailto:sdhibar@scholar.buruniv.ac.in) (S Dhibar); [b\\_saha31@rediffmail.com](mailto:b_saha31@rediffmail.com) (B. Saha)

‡KK and AD should be treated as joint first authors.

**TEM Image of Zn-AA Metallogel:**

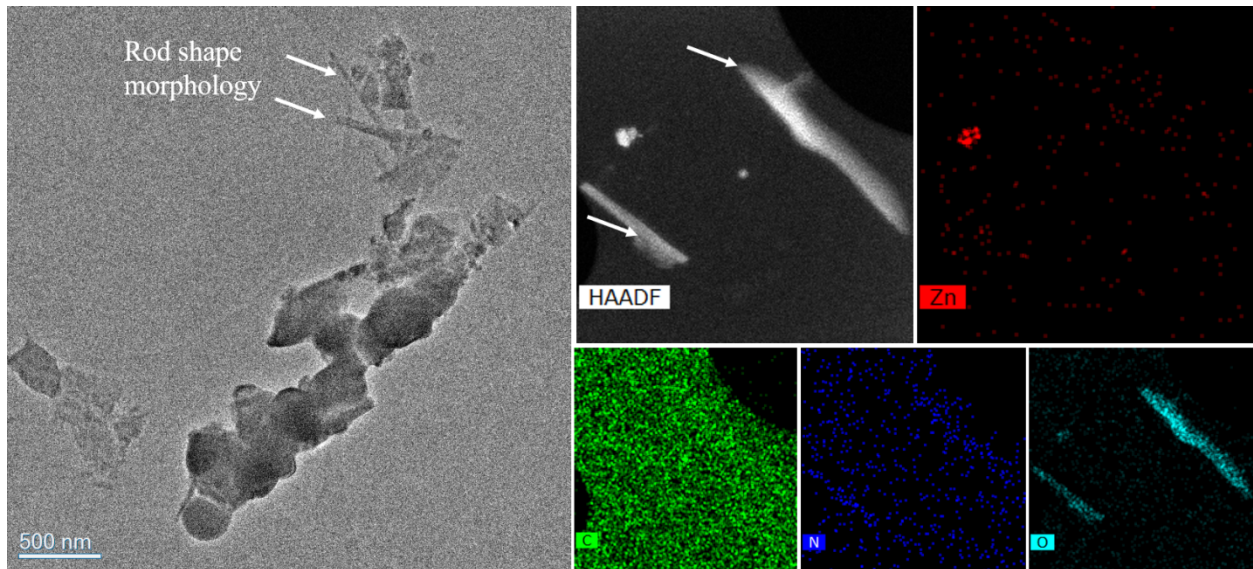

**Fig S1:** Bright field TEM shows rod shaped morphology. Elemental mapping is acquired by STEM EDX'.
